# Supplementary material
Source: PubMed Central journal article supplement (PMC7329029)
Supplement: rspb20200490supp1.pdf [file rspb20200490supp1.pdf]

## 1 Appendix A

### 2 *Acoustic disturbance*

3 Based on a meta-analysis of sound exposure experiments [1], we summarize known effects of  
4 anthropogenic noise for fish in Table S1. Subsequently, we identify, based on documented  
5 responses of fish to changes in physiology or behaviour, potential direct consequences for  
6 individual-level processes in the model (energy expenditure, food intake, mortality and  
7 reproductive output; Table S1). It should be noted that, while many acoustic disturbances are of  
8 an impulsive nature (seismic surveys, pile driving), our choice of 'potential effects' relate to  
9 regular exposure to such pulses, not the effects of individual pulses. We give a broad overview  
10 of how acoustic disturbances may affect individual-level processes (Table S1) to motivate the  
11 link between acoustic disturbances and changes in individual level processes.

12 Across different fish species, anthropogenic noise has been shown to increase stress and affect  
13 foraging behaviour, movement behaviour and the auditory system [1]. Stress has been linked to  
14 increased energy expenditure, decreased food intake, increased mortality and decreased  
15 reproductive output (Table S1). Changes in foraging behaviour may result in increased energy  
16 expenditure or lower food intake, while short-term consequences for mortality or reproductive  
17 output seem unlikely (Table S1). Changes in movement behaviour may lead to increased energy  
18 expenditure (Table S1) but have not been documented to affect food intake or reproductive  
19 output. Changes in the auditory system of fish may lead to decreased food intake, increased  
20 mortality and decreased reproduction (for example, through the negative consequences of  
21 elevated hearing thresholds; Table S1). Although it has often been argued that displacement  
22 from foraging areas and spawning grounds affects fish [2], these effects play on a larger scale  
23 than the experiments reviewed by Cox et al. [1] and we did not include this link in our table. Yet,  
24 we do analyse the effect of reduced reproductive output on the population growth rate based on  
25 another link in the table. In summary, anthropogenic noise could eventually lead to increased  
26 energy expenditure, reduced food intake, increased mortality and reduced reproductive output  
27 for individual cod (Table S1).

28 *Model formulation*

29 The body mass of an individual is assumed to consist of structural mass  $x$  (muscles and bones),  
30 reserves  $y_r$  (lipids and fat) and gonads  $y_g$ . Total individual body mass  $w$  is hence given by:

31 
$$w = x + y_r + y_g.$$

32 The mass-length relationship equals:

33 
$$x = \frac{\gamma l^\delta}{(1 + q_j)},$$

34 which relates the structural mass  $x$  to the condition parameter  $q_j$  and the length  $l$  with scaling  
35 parameters  $\gamma$  and  $\delta$ .

36 Food ingestion follows a Holling type-II functional response. Unlike van Leeuwen et al. [3], we do  
37 not explicitly consider multiple food resources. Instead, the food ingestion rate  $I(l)$  is defined as  
38 the ratio between the feeding level  $F(l)$  and the time the individual needs to digest a unit mass  
39 of food  $G(l)$  (the inverse  $1/G(l)$  equals an individual's maximum feeding rate):

40 
$$I(l) = \frac{1}{G(l)} (1 - \psi_I) F(l).$$

41 The feeding level  $F(l)$  is assumed constant in time, but body size-dependent (figure S1B). Food  
42 ingestion decreases proportionally with acoustic foraging disturbance multiplier  $\psi_I$ . Digestion  
43 time scales with length as:

44 
$$G(l) = \varepsilon l^\theta,$$

45 with scaling constant  $\varepsilon$  and exponent  $\theta$ .

46 The net-energy  $N(l, w)$  equals:

47 
$$N(l, w) = \sigma I(l) - (1 + \psi_T) T(w).$$

48 Ingested food is assimilated to energy with efficiency  $\sigma$ . The energy is then first used to cover the  
 49 energy expenditure for metabolic maintenance. The standard metabolic maintenance  
 50 requirements are represented by term  $T(w)$ . The energy expenditure increases proportionally  
 51 with the acoustic disturbance energy expenditure multiplier  $\psi_T$  relative to the standard  
 52 metabolic maintenance requirements. The standard metabolic requirements depend on the total  
 53 body weight, including both structural and reversible mass:

$$54 \quad T(w) = \alpha w^\beta,$$

55 with scaling constant  $\alpha$  and exponent  $\beta$ .

56 To assess the population growth rate, we consider a situation with ample food availability. The  
 57 net-energy is always taken to be positive and we do not consider starvation conditions.

58 A proportion  $k$  of the net-energy is invested in growth in structural mass; the remaining  
 59 proportion  $1 - k$  of the net-energy is invested in reversible and gonad mass (see below). The  
 60 proportion  $k$  is defined as:

$$61 \quad k(l, x, y_r, y_g) = \begin{cases} \frac{1}{q(l) + 1}, & \frac{y_r + y_g}{x} > q(l) \\ \frac{1}{q(l) + 1} \left( \frac{y_r + y_g}{q(l)x} \right)^2, & \text{otherwise.} \end{cases}$$

$$62 \quad q(l) = \begin{cases} q_j, & l < l_m; \\ q_a, & \text{otherwise.} \end{cases}$$

63 The proportion  $k$  depends on the ratio between the reversible ( $y_r + y_g$ ) and structural ( $x$ ) mass.

64 The proportion  $k$  targets for a constant ratio  $q(l)$  between reversible and structural mass (note

65 that  $k = 1/(q(l) + 1)$  when  $y_r + y_g = q(l)x$ ). When the actual ratio between reversible and

66 structural mass drops below the target condition level  $q(l)$ ,  $k(l, x, y_r, y_g)$  decreases with a

67 decrease in the ratio between the reversible and structural mass. This slows down growth in

68 structural mass and favours restoring reserve mass to reach the target condition. The value of

69  $q(l)$  depends on the size of the individual, it is equal to  $q_j$  before, and equal to  $q_a$  after they have

70 become sexually mature. Sexual maturity is reached when an individual reaches the size at  
 71 maturation  $l_m$ . Since  $q_j < q_a$ , adults accumulate more reserves than juveniles, a surplus they  
 72 allocate to reproduction.

73 For each individual, mortality is a sum of background mortality  $\mu_0$ , size-dependent background  
 74 mortality  $D_s$ , and, fisheries  $D_v$  mortality, resulting in the following equation for the per capita  
 75 mortality rate:

$$76 \quad D(l) = (1 + \psi_D)\mu_0 + D_s(l) + D_v(l).$$

77 The term  $\psi_D \mu_0$ , background mortality multiplied by acoustic disturbance mortality multiplier  
 78  $\psi_D$ , represents the increase in mortality due to acoustic disturbance. The size-dependent  
 79 background mortality  $D_s(l)$  decreases exponentially with body size:

$$80 \quad D_s(l) = \mu_s e^{-\left(\frac{l}{l_s}\right)^\delta},$$

81 with mortality constant  $\mu_s$  and characteristic size  $l_s$ . Fisheries mortality  $D_v(l)$  depends on body  
 82 size following a double sigmoid function (see Figure S1C):

$$83 \quad D_v(l) = \mu_v \left( X(l, l_v, l_{vh}) - (1 - \rho) X(l, l_{vd}, l_{vdh}) \right),$$

84 in which  $X(l, l_1, l_2)$  is defined as:

$$85 \quad X(l, l_1, l_2) = \begin{cases} 0.0, & nx \leq 0.0 \\ \frac{1}{6} nx^3, & 0.0 < nx \leq 1.0 \\ \left(-\frac{3}{2} nx + \frac{3}{2} nx^2 - \frac{1}{3} nx^3 + 0.5\right), & 1.0 < nx \leq 2.0 \\ \left(\frac{9}{2} nx - \frac{3}{2} nx^2 + \frac{1}{6} nx^3 - 3.5\right), & 2.0 < nx \leq 3.0 \\ 1.0, & \text{otherwise} \end{cases} \quad \text{with } nx = 1.5 \frac{(l - l_1)}{(l_2 - l_1)}.$$

86 The fisheries mortality depends on mortality constant  $\mu_v$ , the average fisheries retention in the  
 87 largest size classes'  $\rho$  and sigmoid function  $X(l, l_1, l_2)$ . The sigmoid function depends on the  
 88 body length  $l$ , the length at the start  $l_1$  and at 50%  $l_2$  of the s-shaped part of the function. For the  
 89 increasing part of  $D_v(l)$ , the sigmoid is defined by the length at the start ( $l_v$ ) and at 50% ( $l_{vh}$ ) of

90 fisheries retention. For the decreasing part of  $D_v(l)$ , the sigmoid depends on the length at the  
 91 start ( $l_{vd}$ ) and at 50% ( $l_{vdh}$ ) of the fisheries mortality decline (Figure S1C).

92 The individual life history is a mix of continuous and discrete time processes that operate within  
 93 each year. The individual-level functions for feeding, energy allocation and mortality lead to a set  
 94 of ODEs that describe the continuous-time changes of the individual throughout its life. The age  
 95  $a$ , structural mass  $x$ , length  $l$  and survival probability  $s$  change continuously with time  $\tau$  as:

$$96 \quad \frac{da}{d\tau} = 1.0,$$

$$97 \quad \frac{dx}{d\tau} = \kappa N,$$

$$98 \quad \frac{dl}{d\tau} = \frac{dx}{d\tau} / \frac{dx}{dl} = kN \frac{l}{\delta x},$$

$$99 \quad \frac{ds}{d\tau} = -D(l)s.$$

100 The dynamics of the reversible mass of reserves  $y_r$  and gonads  $y_g$  depend on the time of the year  
 101 and the sexual maturity of the individual. During the first period, with length  $\tau_r$ , of each year, the  
 102 energy invested in reversible and gonad mass is stored in the reserves only and the gonads  
 103 remain empty. Within each year  $n$  with length  $Y$ , these dynamics during the intervals  $(nY) \leq \tau <$   
 104  $(nY + \tau_r)$  are hence described by:

$$106 \quad \frac{dy_r}{d\tau} = (1 - k) \eta$$

$$107 \quad \frac{dy_g}{d\tau} = 0.0.$$

105

108 At day  $\tau_r$  within each year (that is, at all time-points  $q_n = (nY + \tau_r)$ ), the individual decides  
 109 whether it will spawn at the end of the year. This decision depends on the reserve mass in  
 110 relation to the target body condition:

$$111 \quad y_g(q_n^+) = \begin{cases} 0.0, & y_r(q_n^-) \leq q_j x(q_n^-) \\ y_r(q_n^-) - q_j x(q_n^-), & y_r(q_n^-) > q_j x(q_n^-) \end{cases}$$

$$y_r(\varrho_n^+) = \begin{cases} y_r(\varrho_n^-), & y_r(\varrho_n^-) \leq q_j x(\varrho_n^-) \\ q_j x(\varrho_n^-), & y_r(\varrho_n^-) > q_j x(\varrho_n^-) \end{cases}$$

113 If the ratio of reserves over structural mass is smaller than or equal to  $q_j$ , the individual will not  
 114 spawn because any investment in reproduction would lower the body condition below the  
 115 target condition  $q_j$ . In this case, all variables stay the same. On the other hand, if the ratio of  
 116 reserves over structural mass is larger than  $q_j$ , the individual will spawn. In this case, the  
 117 surplus of reserve mass, in excess of the target body condition  $q_j$ , is transferred to the gonads.  
 118 All other variables stay the same.

119 Depending on the decisions about spawning at time points  $\varrho_n$ , the dynamics that occur  
 120 subsequently until the end of the year, during intervals  $(nY + \tau_r) \leq \tau < (nY + Y)$ , are:

121 for years without spawning:

$$122 \quad \frac{dy_r}{d\tau} = (1 - k)N,$$

$$123 \quad \frac{dy_g}{d\tau} = 0.0,$$

124 for years with spawning:

$$125 \quad \frac{dy_r}{d\tau} = \begin{cases} (1 - k)N, & l < l_m, \\ 0.0, & l \geq l_m, \end{cases}$$

$$126 \quad \frac{dy_g}{d\tau} = \begin{cases} 0.0, & l < l_m, \\ (1 - k)N, & l \geq l_m. \end{cases}$$

127 If no spawning occurs, energy invested in reversible mass is stored in reserves by all individuals.  
 128 In years with spawning, energy invested in reversible mass is stored in the gonads by  
 129 individuals with a length larger than  $l_m$ . while energy invested in reversible mass is stored in  
 130 the reserves by immature individuals, with length smaller than  $l_m$ .

131 Spawning occurs at the end of each year at day  $Y$ , at the time points  $\zeta_n = (nY + Y)$ :

$$132 \quad B = (1 - \psi_B) \frac{\sigma_r y_g(\zeta_n^-)}{m(l_b)},$$

140 
$$R_0(\zeta_n^+) = R_0(\zeta_n^-) + B s(\zeta_n^-),$$

141 
$$y_g(\zeta_n^+) = 0.0.$$

133 The number of offspring  $B$  that an individual produces depends on the mass of the gonads, the  
134 mass  $m(l_b)$  at the size of birth  $l_b$  and the gonad-to-offspring conversion efficiency  $\sigma_r$ . The  
135 number of offspring produced decreases proportionally with the reproductive failure multiplier  
136  $\psi_B$  due to acoustic disturbance. To calculate the lifetime reproductive output  $R_0$ , the number of  
137 offspring  $B$  is multiplied by the survival probability of the individual and added to the offspring  
138 the individual has produced so far. The gonadal mass is set to zero. All other variables do not  
139 change.

142 The initial state of an individual in the model is defined at the moment at which the individual  
143 starts feeding actively. At this moment, the individual age is  $a_b$  and body size is  $l_b$ . Its survival  
144 probability up to that moment depends on the mortality in the egg and larval phase  $\mu_e$ . The  
145 individuals reserves contain a portion of the total mass such that, while the gonads are empty,  
146 the ratio between reversible and structural mass is equal to the target ratio  $q_j$ . This results in the  
147 following state of the model variables for newborns:

149 
$$a(0) = a_b,$$

150 
$$x(0) = \frac{1}{(1 + q_j)} m(l_b),$$

151 
$$l(0) = l_b,$$

152 
$$s(0) = e^{-\mu_e a_b},$$

153 
$$h(0) = 0.0,$$

154 
$$y_r(0) = \frac{q_j}{(1 + q_j)} m(l_b),$$

155 
$$y_g(0) = 0.0.$$

148

### 156 *Feeding level functions*

157 For the intermediate and low feeding-levels, we assume sigmoid function:

158

$$F = f_1 + f_2 X(l, l_1, l_2).$$

159

The feeding-level starts at level  $f_1$  and gradually shifts following function  $X$  with length to  $f_1 +$

160

$f_2$ . The shift starts at  $l_1$  and at length  $l_2$  the shift is halfway. With  $l_1 = 0.39$  cm and  $l_2 = 30$  cm,

161

we define the intermediate feeding level function as  $F_{int} = 0.7 + 0.25 X(l, 0.39, 30)$  and the low

162

feeding level function as  $F_{low} = 0.55 + 0.35 X(l, 0.39, 30)$  (Figure S1B).

163

### *Model parameters*

164

Parameters and their values are listed in Table S2. The parameter values used by van Leeuwen

165

et al. [3] are based on Baltic Sea cod. To represent Atlantic cod in the North Sea, we adjust the

166

length at maturation ( $l_m$ ), adult target condition ( $q_a$ ) and the size-dependent functions for

167

fisheries retention, energy expenditure for metabolic maintenance, and digestion time (Figure

168

S1A-C). The derivation of these parameter values is described below. Otherwise, we use the

169

parameter values as given in van Leeuwen et al. [3].

170

The metabolic rate and the digestion time are temperature dependent. The average annual

171

North Sea SST is  $\sim 10$  °C [4]. Assuming the sea bottom is about 2 degrees colder, we use 8 °C for

172

the derivation of the size-dependent metabolic rate and the digestion time. The metabolic rate is

173

derived from oxygen consumption of cod reared in light at 8 °C [5]. We convert dry-to-wet body-

174

mass with conversion factor 5 [see data in 5], oxygen to grams energy using an oxy-calorific

175

coefficient of  $13.6 \text{ kJ} \cdot \text{g}^{-1} \text{ O}_2$  [6] and energy-to-wet-weight ratio of 7 kJ/g [7]. To compress

176

annual activity into  $Y = 250$  days (Table S2), we rescale the metabolic rate parameters to  $\beta =$

177

$0.9124$  and  $\alpha = 0.022$  (Figure S1A). The digestion time  $G$  is derived from data of maximum

178

growth in body mass in Atlantic cod, fed ad lib in captivity [8]. For a situation with maximum

179

feeding, the growth in body mass equals the weight increase ( $N$ ) in the model;  $N = \sigma \frac{1}{G} - T$ . We

180

derive digestion time scaling parameters  $\varepsilon = 270.651$  and  $\theta = -2.389$  from the growth rate

181

between  $l = 0.39 - 150$  cm at 8 °C, using a year with length  $Y = 250$  days,  $\sigma = 0.6$  (Table S2)

182

and the metabolic rate above (Table S2, Figure 1B).



183 Fisheries retention is defined as the ratio between the age-specific annual fisheries mortality  
184 rate and the maximum fisheries mortality rate in the same year. We use data from the ICES  
185 fisheries assessments between 2000-2016 [9]. Each age class is converted to a mean annual size-  
186 at-age based on the mean size per age class in the years 2000-2016 of the cod IBTS-survey data  
187 [10]. We use a double s-shaped function for the relationship between fisheries retention and  
188 body size and fitted the curve to the data points manually (Figure S1C). Fisheries retention starts  
189 at  $l_v = 10$  cm and reaches 50% of its maximum at  $l_{vh} = 34$  cm. From  $l_{vd} = 58$  cm, fisheries  
190 retention gradually decreases to the average retention in the last age class (6+ years old)  $\rho =$   
191 0.55 and reaches 50% of this level at  $l_{vdh} = 78$  cm. Over the last ten years, the maximum  
192 fisheries mortality for North Sea cod ranged between 0.35 (2016) and 0.75 (2006; [9]). We use a  
193 daily mortality rate of  $\frac{0.31}{Y} = 0.00124 \text{ d}^{-1}$ , which is the currently advised maximum cod  
194 fisheries mortality [11].

195 The typical size at maturation of Atlantic cod varies across regions; we use  $l_m = 62$  cm, which is  
196 the length where 50% of Atlantic cod in the North Sea are reported mature by Thorsen et al.  
197 [12]. The adult target body condition is taken as  $q_a = 1.2$  based on a mean 24% somatic weight  
198 loss after spawning in Atlantic cod from the Gulf of St. Lawrence [13].

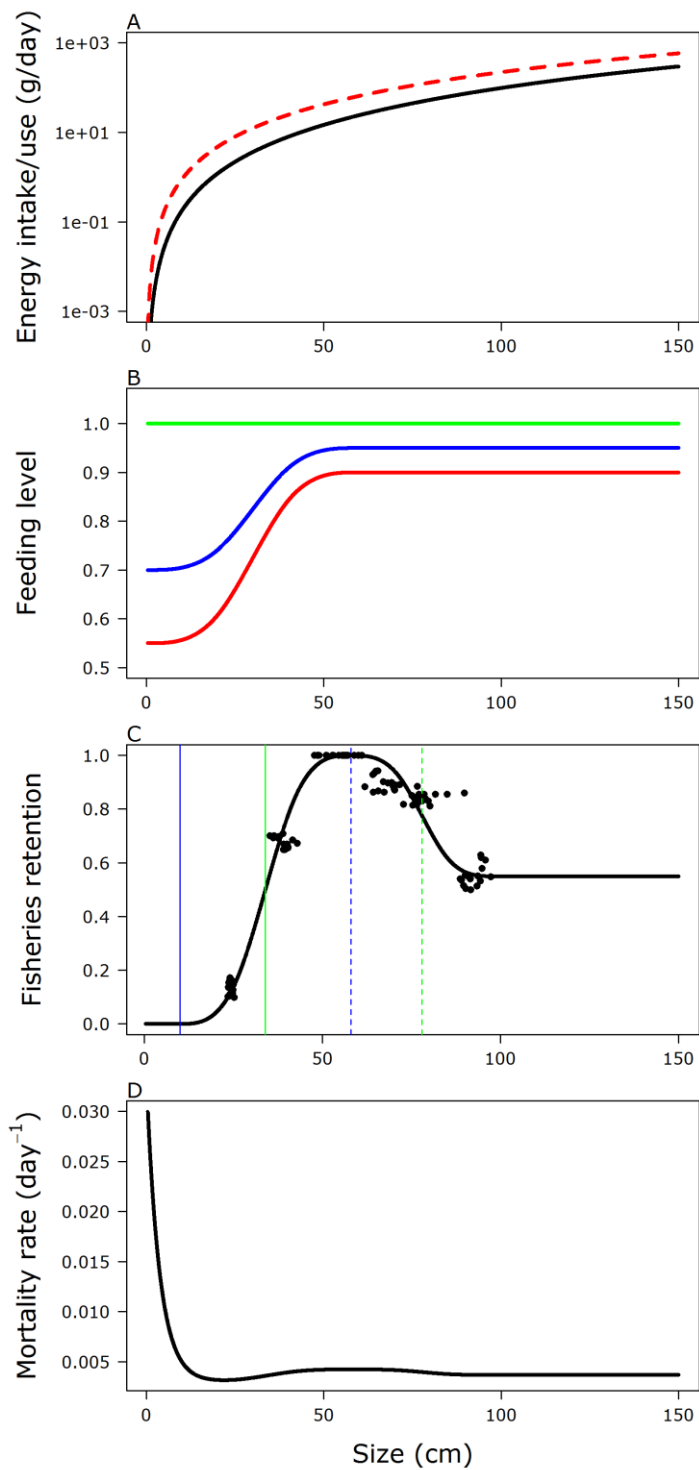

199

200 *Figure S1 (A) Maintenance costs (black solid line) and maximum ingestion rate  $\frac{1}{G}$  (red dashed line), (B) feeding level in case*

201 *of high (green), intermediate (blue) and low (red) food availability, (C) fisheries retention data (black dots; 2000-2016, 65),*

202 *the length at the start of the increase  $l_v$  (blue solid line), at 50% of the increase  $l_{vh}$  (green solid line), at the start of the*

203 *decline  $l_{vd}$  (blue dashed line) and 50% of the decline  $l_{vdh}$  (green dashed line) of fisheries retention and fisheries retention*

204 *implemented in the model (black line) and (D) mortality rate as a function of body size implemented in the model.*

205

206 *Table S1 Potential consequences of anthropogenic noise for individual level processes. The observed effects of anthropogenic noise on fish (row names on the left) were chosen based on a*  
 207 *meta-analysis of anthropogenic noise experiments with fish by Cox et al. [1]. We show an overview of potential consequences of the observed effects of anthropogenic noise for individual level*  
 208 *processes (column names on top) that have been documented for fish. Colours of the cells indicate the quality of evidence (orange – documented consequences for individual level process;*  
 209 *yellow – logical consequence but no consequences have been documented, or, only anecdotal studies of consequences for individual level process; blue – no short-term consequences for*  
 210 *individual level process have been documented)*

| Observations \ Consequences                                                                                                                                   | Energy expenditure                                                                                   | Food intake                                                                           | Mortality                            | Reproductive output                                                                                   |
|---------------------------------------------------------------------------------------------------------------------------------------------------------------|------------------------------------------------------------------------------------------------------|---------------------------------------------------------------------------------------|--------------------------------------|-------------------------------------------------------------------------------------------------------|
| Stress<br>(Higher levels of cortisol)                                                                                                                         | ✓ Elevated cortisol increases the metabolic rate [14].                                               | ✓ Elevated cortisol reduces food intake [15,16].                                      | ? Stress may lead to mortality [17]. | ✓ Elevated cortisol decreases fertilization rate [18], and, leads to deformities in fish larvae [19]. |
| Foraging behaviour<br>(Decrease of foraging behavior, such as: food consumption, foraging efficiency, and discrimination error of prey items.)                | ✓ More energy spent to come to the same food intake [20,21].                                         | ✓ Lower food intake due to less successful foraging or less time spent foraging [22]. | × No direct consequences documented. | × No direct consequences documented.                                                                  |
| Movement behaviour<br>(Increase of movement related behaviour, such as: adjusted swimming depth, directional changes, schooling adjustments, swimming speed.) | ✓ Schooling reduces the energetic costs of movement [23] and faster swimming costs more energy [24]. | × No direct consequences documented.                                                  | × No direct consequences documented. | × No direct consequences documented.                                                                  |
| Auditory system<br>(Changes in the auditory system, such as the hearing threshold.)                                                                           | × No direct consequences documented.                                                                 | ? Lower prey detection.                                                               | ? Lower predator detection.          | ? Cod uses sounds for mate finding [25].                                                              |

| Symbol                  | Unit | Description                                    | Value                 | Source | Derivation                        |
|-------------------------|------|------------------------------------------------|-----------------------|--------|-----------------------------------|
| Model variables         |      |                                                |                       |        |                                   |
| $a$                     | [d]  | Age                                            |                       |        |                                   |
| $x$                     | [g]  | Structural mass                                |                       |        |                                   |
| $y_r$                   | [g]  | Reserves                                       |                       |        |                                   |
| $y_g$                   | [g]  | Gonads                                         |                       |        |                                   |
| $s$                     | -    | Survival probability                           |                       |        |                                   |
| $R_0$                   | -    | Reproductive output                            |                       |        |                                   |
| Derived model variables |      |                                                |                       |        |                                   |
| $l$                     | [cm] | Length                                         | $m = \gamma l^\delta$ |        |                                   |
| $w$                     | [g]  | Total body mass                                | $w = x + y_r + y_g$   |        |                                   |
| $m$                     | [g]  | Length-based mass                              | $m = x(1 + q_j)$      |        | Structural mass and liver weight  |
| Parameters              |      |                                                |                       |        |                                   |
| $\Upsilon$              | [d]  | Length of growing season                       | 250                   | [3]    |                                   |
| $\tau_r$                | [d]  | Day of spawning decision                       | 200                   | [3]    |                                   |
| $a_b$                   | [d]  | Age of first feeding                           | 22                    | [3]    | Atlantic cod, Norway              |
| $l_b$                   | [cm] | Length at birth                                | 0.39                  | [3]    | Atlantic cod, Norway              |
| $l_s$                   | [cm] | Characteristic length mortality                | 3.68                  | [3]    |                                   |
| $l_m$                   | [cm] | Maturation length                              | 62                    | [12]   | Length 50% mature (North Sea cod) |
| $l_v$                   | [cm] | Size of start fishing vulnerability            | 10                    | [9]    | North Sea cod                     |
| $l_{vh}$                | [cm] | Size of 50% fishing vulnerability              | 34                    | [9]    | North Sea cod                     |
| $l_{vd}$                | [cm] | Size of start decrease fisheries vulnerability | 58                    | [9]    | North Sea cod                     |

|               |                             |                                              |         |       |                                                             |
|---------------|-----------------------------|----------------------------------------------|---------|-------|-------------------------------------------------------------|
| $l_{vdh}$     | [cm]                        | Size of %50 decrease fisheries vulnerability | 78      | [9]   | North Sea cod                                               |
| $\rho$        | -                           |                                              | 0.55    | [9]   | North Sea cod                                               |
| $q_j$         | -                           | Juvenile condition target                    | 0.7     | [3]   |                                                             |
| $q_a$         | -                           | Adult condition target                       | 1.2     | [13]  | Atlantic cod, NW Atlantic                                   |
| $\gamma$      | $[(g\ cm^{-1})^\delta]$     | Length-weight scaling constant               | 0.01    | [3]   | Atlantic cod, NE Atlantic                                   |
| $\delta$      | -                           | Length-weight scaling exponent               | 3.0     | [3]   | Atlantic cod, NE Atlantic                                   |
| $\varepsilon$ | $[d\ cm^{-\theta}g^{-1}]$   | Digestion time scaling constant              | 270.651 | [5,8] | Derived from maximum growth rate, metabolic rate and $I(l)$ |
| $\theta$      | -                           | Digestion time scaling exponent              | -2.389  | [5,8] | Derived from maximum growth rate, metabolic rate and $I(l)$ |
| $\alpha$      | $[g^{1-\beta}d^{-1}g^{-1}]$ | Metabolic rate scaling constant              | 0.022   | [5]   | Derived from oxygen consumption of Atlantic cod at 8 C      |
| $\beta$       | -                           | Metabolic rate scaling exponent              | 0.9124  | [5]   | Derived from oxygen consumption of Atlantic cod at 8 C      |
| $\sigma_0$    | -                           | Conversion efficiency                        | 0.6     | [3]   | Across fish species                                         |
| $\sigma_r$    | -                           | Gonad-offspring conversion efficiency        | 0.5     | [3]   | Female offspring only                                       |
| $\mu_e$       | $[d^{-1}]$                  | Egg mortality                                | 0.03    | [3]   |                                                             |
| $\mu_s$       | $[d^{-1}]$                  | Size-dependent mortality constant            | 0.03    | [3]   |                                                             |
| $\mu_0$       | $[d^{-1}]$                  | Size-independent background mortality        | 0.003   | [3]   |                                                             |

|            |                    |                                          |                              |      |                               |
|------------|--------------------|------------------------------------------|------------------------------|------|-------------------------------|
| $\mu_v$    | [d <sup>-1</sup> ] | Fishing mortality                        | 0.00124                      | [11] | North Sea cod fisheries, FMSY |
| $F_{high}$ |                    |                                          | 1.0                          |      |                               |
| $F_{int}$  |                    |                                          | 0.7<br>+ 0.25 X(L, 0.39,30)  |      | Length dependent              |
| $F_{low}$  |                    |                                          | 0.55<br>+ 0.35 X(L, 0.39,30) |      | Length dependent              |
| $\psi_D$   |                    | Acoustic mortality multiplier            | 0 - 10                       |      |                               |
| $\psi_B$   |                    | Acoustic reproductive failure multiplier | 0 - 1                        |      |                               |
| $\psi_T$   |                    | Acoustic energy expenditure multiplier   | 0 - 1                        |      |                               |
| $\psi_I$   |                    | Acoustic feeding failure multiplier      | 0 - 1                        |      |                               |

213

#### 214 *References used in Appendix A*

- 215 1. Cox K, Brennan LP, Gerwing TG, Dudas SE, Juanes F. 2018 Sound the alarm: A meta-analysis on the effect of aquatic  
216 noise on fish behavior and physiology. *Glob. Change Biol.* **24**, 1–12. (doi:10.1111/gcb.14106)
- 217 2. Popper AN, Hastings MC. 2009 The effects of human-generated sound on fish. *Integr. Zool.* **4**, 43–52.  
218 (doi:10.1111/j.1749-4877.2008.00134.x)
- 219 3. van Leeuwen A, Huss M, G\aaardmark A, Casini M, Vitale F, Hjelm J, Persson L, de Roos AM. 2013 Predators with  
220 multiple ontogenetic niche shifts have limited potential for population growth and top-down control of their prey.  
221 *Am. Nat.* **182**, 53–66. (doi:10.1086/670614)
- 222 4. Belvin I. 2016 Sea surface temperature trends in large marine ecosystems. In *Large Marine Ecosystems: Status and*  
223 *Trends*, pp. 101–109. Nairobi: United Nations Environment Programme.
- 224 5. Finn R, Rønnestad I, van der Meeren T, Fyhn H. 2002 Fuel and metabolic scaling during the early life stages of  
225 Atlantic cod *Gadus morhua*. *Mar. Ecol. Prog. Ser.* **243**, 217–234. (doi:10.3354/meps243217)
- 226 6. Elliott JM, Davison W. 1975 Energy equivalents of oxygen consumption in animal energetics. *Oecologia* **19**, 195–  
227 201. (doi:10.1007/BF00345305)
- 228 7. Peters RH. 1983 *The Ecological Implications of Body Size*. 1st edn. Cambridge: Cambridge University Press.
- 229 8. Björnsson B, Steinarsson A, Árnason T. 2007 Growth model for Atlantic cod (*Gadus morhua*): Effects of  
230 temperature and body weight on growth rate. *Aquaculture* **271**, 216–226.  
231 (doi:10.1016/j.aquaculture.2007.06.026)
- 232 9. ICES. 2017 Report of the Working Group on Assessment of Demersal Stocks in the North Sea and Skagerrak  
233 (2017), 26 April–5 May 2017. , 1248.
- 234 10. ICES. 2018 ICES Database of Trawl Surveys (DATRAS).
- 235 11. ICES. 2018 Cod (*Gadus morhua*) in subarea 4, division 7.d, and subdivision 20 (North Sea, eastern English Channel,  
236 Skagerrak). *ICES Advice Fish. Oppor. Catch Effort Gt. North Sea Ecoregio* , 1–15. (doi:10.17895/ices.pub.4436)

- 237 12. Thorsen A, Witthames PR, Marteinsdóttir G, Nash RDM, Kjesbu OS. 2010 Fecundity and growth of Atlantic cod  
238 (Gadus morhua L.) along a latitudinal gradient. *Fish. Res.* **104**, 45–55. (doi:10.1016/j.fishres.2010.03.020)
- 239 13. Lambert Y, Dutil J-D. 2000 Energetic consequences of reproduction in Atlantic cod (*Gadus*  
240 *morhua*) in relation to spawning level of somatic energy reserves. *Can. J. Fish. Aquat. Sci.*  
241 **57**, 815–825. (doi:10.1139/f00-022)
- 242 14. Barton BA, Schreck CB. 1987 Metabolic cost of acute physical stress in juvenile steelhead. *Trans. Am. Fish. Soc.* **116**,  
243 257–263. (doi:10.1577/1548-8659(1987)116<257:MCOAPS>2.0.CO;2)
- 244 15. Bernier NJ. 2006 The corticotropin-releasing factor system as a mediator of the appetite-suppressing effects of  
245 stress in fish. *Gen. Comp. Endocrinol.* **146**, 45–55. (doi:10.1016/j.ygcen.2005.11.016)
- 246 16. Madison BN, Tavakoli S, Kramer S, Bernier NJ. 2015 Chronic cortisol and the regulation of food intake and the  
247 endocrine growth axis in rainbow trout. *J. Endocrinol.* **226**, 103–119. (doi:10.1530/JOE-15-0186)
- 248 17. Olla BL, Davis MW, Schreck CB. 1995 Stress-induced impairment of predator evasion and non-predator mortality  
249 in Pacific salmon. *Aquac. Res.* **26**, 393–398. (doi:10.1111/j.1365-2109.1995.tb00928.x)
- 250 18. Sierra-Flores R, Atack T, Migaud H, Davie A. 2015 Stress response to anthropogenic noise in Atlantic cod *Gadus*  
251 *morhua* L. *Aquac. Eng.* **67**, 67–76. (doi:10.1016/j.aquaeng.2015.06.003)
- 252 19. Morgan MJ, Wilson CE, Crim LW. 1999 The effect of stress on reproduction in Atlantic cod. *J. Fish Biol.* **54**, 477–488.  
253 (doi:10.1006/jfbi.1998.0884)
- 254 20. Townsend CR, Winfield IJ. 1985 The application of optimal foraging theory to feeding behaviour in fish. In *Fish*  
255 *Energetics* (eds P Tytler, P Calow), pp. 67–98. (doi:10.1007/978-94-011-7918-8\_3)
- 256 21. Kemp PS, Gilvear DJ, Armstrong JD. 2006 Variation in performance reveals discharge-related energy costs for  
257 foraging Atlantic salmon (*Salmo salar*) parr. *Ecol. Freshw. Fish* **15**, 565–571. (doi:10.1111/j.1600-  
258 0633.2006.00200.x)
- 259 22. Voellmy IK, Purser J, Flynn D, Kennedy P, Simpson SD, Radford AN. 2014 Acoustic noise reduces foraging success  
260 in two sympatric fish species via different mechanisms. *Anim. Behav.* **89**, 191–198.  
261 (doi:10.1016/j.anbehav.2013.12.029)
- 262 23. Marras S, Killen SS, Lindström J, McKenzie DJ, Steffensen JF, Domenici P. 2015 Fish swimming in schools save  
263 energy regardless of their spatial position. *Behav. Ecol. Sociobiol.* **69**, 19–226. (doi:10.1007/s00265-014-1834-4)
- 264 24. Webb PW. 1971 The swimming energetics of trout II. Oxygen consumption and swimming efficiency. *J. Exp. Biol.*  
265 **55**, 521–540.
- 266 25. Nordeide JT, Kjellsby E. 1999 Sound from spawning cod at their spawning grounds. *ICES J. Mar. Sci.* **56**, 326–332.  
267 (doi:10.1006/jmsc.1999.0473)
- 268
